# Supplementary material
Source: PubMed Central journal article supplement (PMC3246237)

Juvenile 2

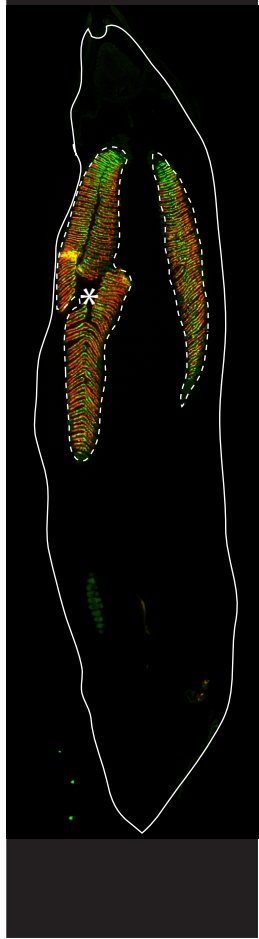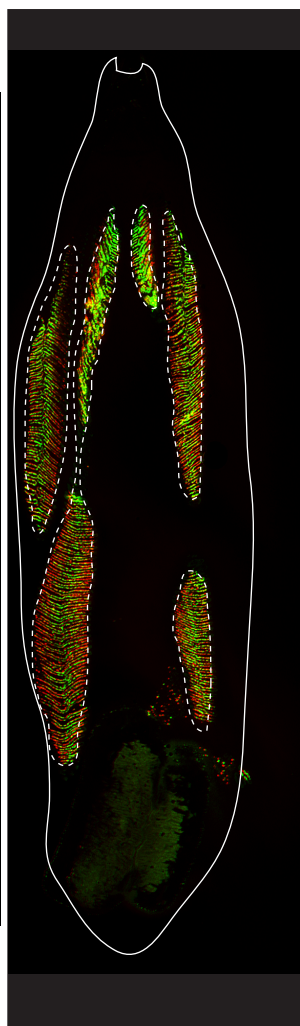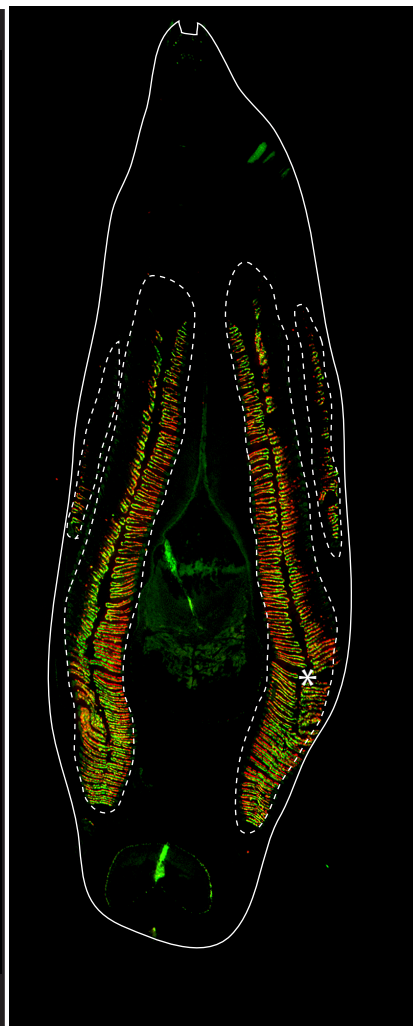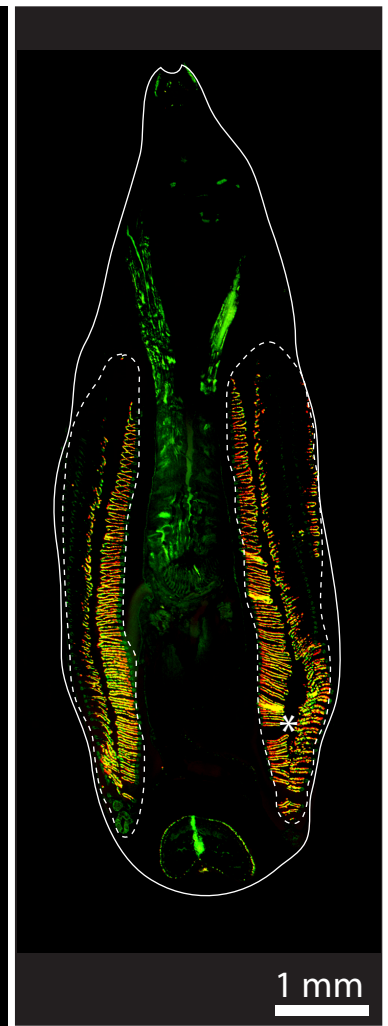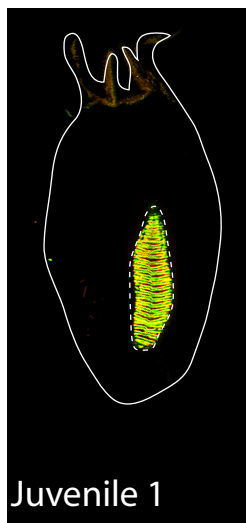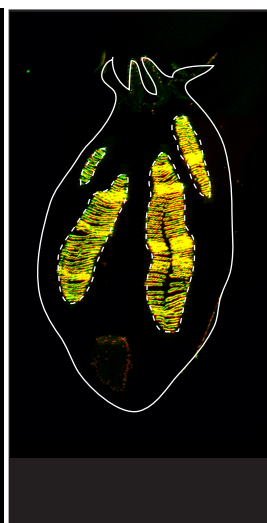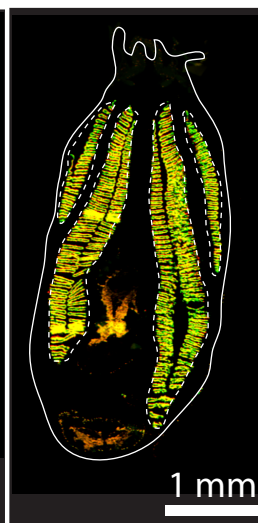

Juvenile 1

Supplement: ismej201181x1.pdf [file ismej201181x1.pdf]
